# Supplementary material for: Effect of Blood Component Coatings of Enosseal Implants on Proliferation and Synthetic Activity of Human Osteoblasts and Cytokine Production of Peripheral Blood Mononuclear Cells
Source: Hindawi journal article supplement (doi:10.1155/2016/8769347), 2016-01-01
Supplement: f1 [file 8769347.f1.pdf]

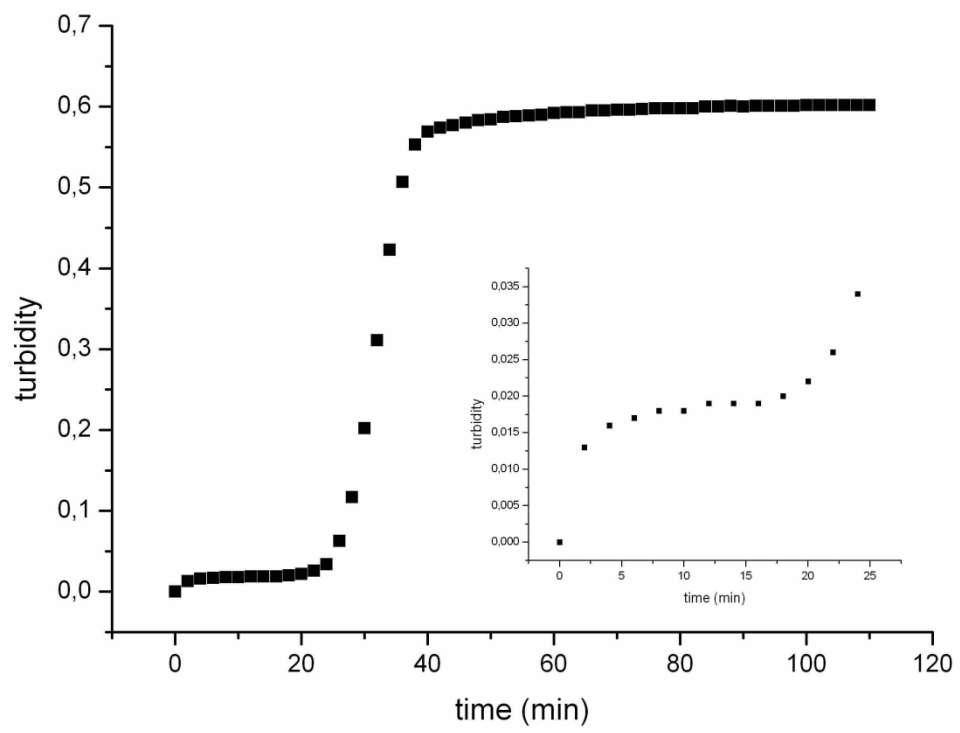

|   | a             | b            | c     | d     | e          | f            | g              | g      | h             | l      | j             | k              |
|---|---------------|--------------|-------|-------|------------|--------------|----------------|--------|---------------|--------|---------------|----------------|
| 1 | Pos           | Pos          | Neg   | Neg   | ENA-78     | GCSF         | GM-CSF         | GRO    | GRO- $\alpha$ | I-309  | IL-1 $\alpha$ | IL-1 $\beta$   |
| 2 | Pos           | Pos          | Neg   | Neg   | ENA-78     | GCSF         | GM-CSF         | GRO    | GRO- $\alpha$ | I-309  | IL-1 $\alpha$ | IL-1 $\beta$   |
| 3 | IL-2          | IL-3         | IL-4  | IL-5  | IL-6       | IL-7         | IL-12 p40p70   | IL-10  | IL-8          | IL-13  | IL-15         | IFN- $\gamma$  |
| 4 | IL-2          | IL-3         | IL-4  | IL-5  | IL-6       | IL-7         | IL-12 p40p70   | IL-10  | IL-8          | IL-13  | IL-15         | IFN- $\gamma$  |
| 5 | MCP-1         | MCP-2        | MCP-3 | MC-SF | MDC        | MIG          | MIP-10         | RANTES | SCF           | SDF-1  | TARC          | TGF- $\beta$ 1 |
| 6 | MCP-1         | MCP-2        | MCP-3 | MC-SF | MDC        | MIG          | MIP-10         | RANTES | SCF           | SDF-1  | TARC          | TGF- $\beta$ 1 |
| 7 | TNF- $\alpha$ | TNF- $\beta$ | EGF   | IGF-I | Angiogenin | Oncostatin M | Thrombopoietin | VEGF   | PDGF BB       | Leptin | Neg           | Pos            |
| 8 | TNF- $\alpha$ | TNF- $\beta$ | EGF   | IGF-I | Angiogenin | Oncostatin M | Thrombopoietin | VEGF   | PDGF BB       | Leptin | Neg           | Pos            |
